# Supplementary material for: Satellite‐Based Monitoring of Eutrophication in the Earth's Largest Transboundary Lake
Source: PubMed Central journal article supplement (PMC10148676; doi:10.1029/2022gh000770), 2023-04-29
Supplement: GH2-7-e2022GH000770-s001.pdf [file GH2-7-e2022GH000770-s001.pdf]

*[GeoHealth]*

Supporting Information for

**Satellite-Based Monitoring of Eutrophication in the Earth's Largest Transboundary Lake**

**Zohra Mozafari<sup>1</sup>, Roohollah Noori<sup>2,3,\*</sup>, Seyed Mostafa Siadatmousavi<sup>1</sup>, Hossein Afzalimehr<sup>1</sup>, Jafar Azizpour<sup>4</sup>**

<sup>1</sup>School of Civil Engineering, Iran University of Science and Technology, Narmak, Tehran 1684613114, Iran.

<sup>2</sup>Graduate Faculty of Environment, University of Tehran, Tehran, 1417853111, Iran.

<sup>3</sup>Faculty of Governance, University of Tehran, Tehran, 1439814151, Iran.

<sup>4</sup>Iranian National Institute for Oceanography and Atmospheric Science (INIOAS), Tehran, 1411813389, Iran.

Corresponding author: Roohollah Noori ([noon@ut.ac.ir](mailto:noon@ut.ac.ir)); ORCID: <http://orcid.org/0000-0002-7463-8563>

**Contents of this file**

Tables S1 and S2

**Table S1.** The *in-situ* measured Chl-*a* data ( $\mu\text{g/L}$ ) which collected by the Iranian National Institute for Oceanography and Atmospheric Science (INIOAS) near the coast of Iran in 2009, 2012, 2018, and 2019. Geographical location of the sampling points is shown in the panel (a) of Fig. 1.

| Station | In-situ measured Chl- <i>a</i> ( $\mu\text{g/L}$ ) | Chl- <i>a</i> derived from the MODIS-Aqua ( $\mu\text{g/L}$ ) | Sampling date | Station | In-situ measured Chl- <i>a</i> ( $\mu\text{g/L}$ ) | Chl- <i>a</i> derived from the MODIS-Aqua ( $\mu\text{g/L}$ ) | Sampling date |
|---------|----------------------------------------------------|---------------------------------------------------------------|---------------|---------|----------------------------------------------------|---------------------------------------------------------------|---------------|
| A1      | 2.30                                               | 3.52                                                          | 09.11.2009    | D1      | 1.00                                               | 1.07                                                          | 26.01.2019    |
| A2      | 2.20                                               | 3.53                                                          | 09.11.2009    | D2      | 1.30                                               | 2.46                                                          | 31.01.2019    |
| A3      | 2.00                                               | 3.52                                                          | 09.11.2009    | D3      | 1.90                                               | 2.64                                                          | 26.01.2019    |
| A4      | 1.70                                               | 3.36                                                          | 09.11.2009    | D4      | 2.20                                               | 2.44                                                          | 01.02.2019    |
| A5      | 1.70                                               | 2.07                                                          | 09.11.2009    | D5      | 2.10                                               | 2.23                                                          | 18.02.2019    |
| B1      | 0.70                                               | 2.10                                                          | 05.10.2012    | D6      | 2.30                                               | 2.38                                                          | 18.02.2019    |
| B2      | 1.70                                               | 3.28                                                          | 05.10.2012    | D7      | 2.90                                               | 3.99                                                          | 18.02.2019    |
| B3      | 1.30                                               | 1.41                                                          | 05.10.2012    | D8      | 2.70                                               | 3.22                                                          | 23.02.2019    |
| B4      | 0.40                                               | 1.09                                                          | 05.10.2012    | D9      | 1.70                                               | 1.77                                                          | 23.02.2019    |
| B5      | 0.40                                               | 0.80                                                          | 05.10.2012    | D10     | 1.20                                               | 1.54                                                          | 27.04.2019    |
| B6      | 0.40                                               | 0.83                                                          | 05.10.2012    | D11     | 1.00                                               | 1.63                                                          | 01.05.2019    |
| B7      | 0.40                                               | 0.79                                                          | 05.10.2012    | D12     | 2.10                                               | 2.37                                                          | 06.05.2019    |
| B8      | 0.40                                               | 2.10                                                          | 05.10.2012    | D13     | 1.80                                               | 2.40                                                          | 06.05.2019    |
| B9      | 0.20                                               | 1.26                                                          | 05.10.2012    | D14     | 3.30                                               | 3.74                                                          | 16.07.2019    |
| B10     | 0.30                                               | 0.69                                                          | 05.10.2012    | D15     | 0.80                                               | 1.55                                                          | 22.07.2019    |
| B11     | 0.30                                               | 0.69                                                          | 05.10.2012    | D16     | 0.80                                               | 1.97                                                          | 22.07.2019    |
| B12     | 0.20                                               | 0.72                                                          | 05.10.2012    | D17     | 1.00                                               | 1.96                                                          | 22.07.2019    |
| C1      | 0.90                                               | 1.97                                                          | 08.12.2018    | D18     | 1.10                                               | 1.77                                                          | 11.08.2019    |
| C2      | 1.50                                               | 2.40                                                          | 08.12.2018    | D19     | 0.80                                               | 1.83                                                          | 16.08.2019    |
| C3      | 1.93                                               | 2.00                                                          | 08.12.2018    | D20     | 1.73                                               | 2.21                                                          | 16.08.2019    |
| C4      | 1.50                                               | 2.30                                                          | 09.12.2018    | D21     | 1.30                                               | 2.30                                                          | 16.08.2019    |
| C5      | 1.20                                               | 1.40                                                          | 10.12.2018    |         |                                                    |                                                               |               |
| C6      | 1.50                                               | 1.52                                                          | 16.12.2018    |         |                                                    |                                                               |               |
| C7      | 1.80                                               | 2.31                                                          | 16.12.2018    |         |                                                    |                                                               |               |
| C8      | 1.70                                               | 2.30                                                          | 16.12.2018    |         |                                                    |                                                               |               |

**Table S2.** Depth profiles of Chl-*a* data (up to 50 m) measured at the sampling zones during 2018 and 2019 in the south Caspian Sea. Geographical location of the sampling zones is shown in the panel (b) of Fig. 1.

| WINTER |                 |                                                                                |      |      |      |      |      |      |      |      |      |
|--------|-----------------|--------------------------------------------------------------------------------|------|------|------|------|------|------|------|------|------|
| No.    | Water depth (m) | Depth profile of Chl- <i>a</i> ( $\mu\text{g/L}$ ) in different sampling zones |      |      |      |      |      |      |      |      |      |
|        |                 | S1                                                                             | S2   | S3   | S4   | S5   | S6   | S7   | S8   | S9   | S10  |
| 1      | 0-1             | 0.50                                                                           | 0.80 | 0.17 | 0.38 | 0.71 | 0.42 | 0.55 | 0.30 | 0.65 | 1.16 |
| 2      | 1-2             | 0.57                                                                           | 1.30 | 0.60 | 0.80 | 1.03 | 0.61 | 0.97 | 0.47 | 0.57 | 1.75 |
| 3      | 2-3             | 0.65                                                                           | 1.57 | 1.20 | 1.20 | 1.55 | 1.23 | 1.73 | 0.70 | 1.18 |      |
| 4      | 3-4             | 0.78                                                                           | 2.03 | 1.75 | 2.10 | 2.30 | 1.63 | 2.02 | 0.71 | 0.73 |      |
| 5      | 4-5             | 0.87                                                                           | 2.90 | 2.60 | 3.20 | 2.75 | 1.73 | 1.95 | 0.70 | 0.77 |      |
| 6      | 5-6             | 1.10                                                                           | 3.50 | 3.00 | 3.30 | 2.78 | 1.70 | 1.92 | 0.70 | 0.77 |      |
| 7      | 6-7             | 1.32                                                                           | 3.30 | 3.10 | 3.20 | 2.60 | 1.62 | 1.97 | 0.70 | 0.80 |      |
| 8      | 7-8             | 1.56                                                                           | 3.30 | 3.10 | 3.10 | 2.68 | 1.57 | 1.93 | 0.73 |      |      |
| 9      | 8-9             | 1.77                                                                           | 3.30 | 3.10 | 3.10 | 2.40 | 1.60 | 1.97 | 0.70 |      |      |
| 10     | 9-10            | 1.85                                                                           | 3.37 | 3.25 | 3.20 | 2.53 | 1.43 | 1.82 |      |      |      |
| 11     | 10-11           | 2.12                                                                           | 3.00 | 2.90 | 3.00 | 2.50 | 1.27 | 1.82 |      |      |      |
| 12     | 11-12           | 2.03                                                                           | 2.70 | 2.65 | 3.00 | 2.35 | 1.13 | 1.83 |      |      |      |
| 13     | 12-13           | 2.00                                                                           | 2.70 | 2.70 | 3.00 | 2.35 | 0.93 | 1.83 |      |      |      |
| 14     | 13-14           | 2.12                                                                           | 2.60 | 2.60 | 2.95 | 2.40 | 0.87 | 1.80 |      |      |      |
| 15     | 14-15           | 2.17                                                                           | 2.70 | 2.60 | 2.70 | 2.43 | 0.83 | 1.77 |      |      |      |
| 16     | 15-16           | 2.42                                                                           | 2.90 | 2.40 | 2.05 | 2.30 | 0.85 | 1.77 |      |      |      |
| 17     | 16-17           | 2.61                                                                           | 2.50 | 2.60 | 1.80 | 2.00 | 0.97 | 1.80 |      |      |      |
| 18     | 17-18           | 3.10                                                                           | 2.43 | 2.50 | 2.23 | 2.10 | 0.93 | 1.92 |      |      |      |
| 19     | 18-19           | 2.59                                                                           | 1.90 | 2.30 |      | 2.20 | 0.98 | 1.59 |      |      |      |
| 20     | 19-20           | 2.52                                                                           | 1.90 | 2.30 |      | 2.60 | 1.13 | 1.54 |      |      |      |
| 21     | 20-21           | 2.60                                                                           | 1.90 | 2.10 |      |      | 1.15 | 1.48 |      |      |      |
| 22     | 21-22           | 2.50                                                                           | 1.60 | 1.90 |      |      | 1.20 | 1.53 |      |      |      |
| 23     | 22-23           | 2.55                                                                           | 1.77 | 1.70 |      |      | 1.15 | 1.58 |      |      |      |
| 24     | 23-24           | 2.70                                                                           | 1.73 | 1.60 |      |      | 1.18 | 1.48 |      |      |      |
| 25     | 24-25           | 2.65                                                                           | 1.40 | 1.50 |      |      | 1.30 | 1.38 |      |      |      |
| 26     | 25-26           | 2.65                                                                           | 1.35 | 1.40 |      |      | 1.03 | 1.38 |      |      |      |
| 27     | 26-27           | 2.68                                                                           | 1.40 | 1.30 |      |      | 0.98 | 1.35 |      |      |      |
| 28     | 27-28           | 2.70                                                                           | 1.30 | 1.30 |      |      | 1.00 | 1.30 |      |      |      |

**Table S2.** Depth profiles of Chl-*a* data (up to 50 m) measured at the sampling zones during 2018 and 2019 in the south Caspian Sea. Geographical location of the sampling zones is shown in the panel (b) of Fig. 1.

| <b>WINTER</b> |                 |                                                                                |      |      |      |      |      |      |      |      |     |
|---------------|-----------------|--------------------------------------------------------------------------------|------|------|------|------|------|------|------|------|-----|
| No.           | Water depth (m) | Depth profile of Chl- <i>a</i> ( $\mu\text{g/L}$ ) in different sampling zones |      |      |      |      |      |      |      |      |     |
|               |                 | S1                                                                             | S2   | S3   | S4   | S5   | S6   | S7   | S8   | S9   | S10 |
| 29            | 28-29           | 2.55                                                                           | 1.20 | 1.50 |      |      | 1.00 | 1.40 |      |      |     |
| 30            | 29-30           | 2.65                                                                           | 1.30 |      |      |      | 0.98 | 1.10 |      |      |     |
| 31            | 30-31           | 2.50                                                                           | 1.20 |      |      |      | 0.95 | 1.10 |      |      |     |
| 32            | 31-32           | 2.50                                                                           | 1.25 |      |      |      | 1.00 | 1.00 |      |      |     |
| 33            | 32-33           | 2.65                                                                           | 1.40 |      |      |      | 0.91 | 1.00 |      |      |     |
| 34            | 33-34           | 2.50                                                                           | 1.30 |      |      |      | 1.05 | 1.00 |      |      |     |
| 35            | 34-35           | 2.50                                                                           | 1.50 |      |      |      | 1.00 | 1.00 |      |      |     |
| 36            | 35-36           | 2.00                                                                           | 1.30 |      |      |      | 1.10 | 1.00 |      |      |     |
| 37            | 36-37           | 1.50                                                                           | 1.20 |      |      |      | 0.90 | 1.00 |      |      |     |
| 38            | 37-38           | 1.20                                                                           | 1.20 |      |      |      | 0.90 | 0.90 |      |      |     |
| 39            | 38-39           | 0.80                                                                           | 1.10 |      |      |      | 0.90 | 0.80 |      |      |     |
| 40            | 39-40           | 1.00                                                                           | 1.49 |      |      |      | 1.00 | 0.80 |      |      |     |
| 41            | 40-41           | 1.20                                                                           | 1.54 |      |      |      | 0.80 | 0.60 |      |      |     |
| 42            | 41-42           |                                                                                | 1.42 |      |      |      | 0.80 | 0.60 |      |      |     |
| 43            | 42-43           |                                                                                | 2.25 |      |      |      | 0.80 | 0.60 |      |      |     |
| 44            | 43-44           |                                                                                |      |      |      |      | 0.90 | 0.50 |      |      |     |
| 45            | 44-45           |                                                                                |      |      |      |      |      | 0.50 |      |      |     |
| 46            | 45-46           |                                                                                |      |      |      |      |      | 0.60 |      |      |     |
| 47            | 46-47           |                                                                                |      |      |      |      |      | 0.65 |      |      |     |
| <b>SPRING</b> |                 |                                                                                |      |      |      |      |      |      |      |      |     |
| No.           | Water depth (m) | Depth profile of Chl- <i>a</i> ( $\mu\text{g/L}$ ) in different sampling zones |      |      |      |      |      |      |      |      |     |
|               |                 | S1                                                                             | S2   | S3   | S4   | S5   | S6   | S7   | S8   | S9   | S10 |
| 1             | 0-1             | 0.19                                                                           | 0.25 | 0.27 | 0.73 | 0.31 | 0.30 | 0.20 | 0.32 | 0.35 |     |
| 2             | 1-2             | 0.30                                                                           | 0.60 | 0.80 | 1.05 | 0.39 | 0.40 | 0.14 | 0.42 | 0.44 |     |
| 3             | 2-3             | 0.35                                                                           | 0.75 | 0.90 | 1.00 | 0.46 | 0.50 | 0.25 | 0.50 | 0.52 |     |
| 4             | 3-4             | 0.42                                                                           | 0.90 | 0.90 | 1.00 | 0.60 | 0.60 | 0.35 | 0.62 | 0.72 |     |
| 5             | 4-5             | 0.48                                                                           | 1.00 | 1.10 | 1.10 | 0.67 | 0.70 | 0.43 | 0.77 | 1.25 |     |
| 6             | 5-6             | 0.53                                                                           | 1.20 | 1.25 | 1.23 | 0.80 | 0.80 | 0.50 | 0.78 | 1.41 |     |

**Table S2.** Depth profiles of Chl-*a* data (up to 50 m) measured at the sampling zones during 2018 and 2019 in the south Caspian Sea. Geographical location of the sampling zones is shown in the panel (b) of Fig. 1.

| WINTER |                 |                                                                                |      |      |      |      |      |      |      |      |     |
|--------|-----------------|--------------------------------------------------------------------------------|------|------|------|------|------|------|------|------|-----|
| No.    | Water depth (m) | Depth profile of Chl- <i>a</i> ( $\mu\text{g/L}$ ) in different sampling zones |      |      |      |      |      |      |      |      |     |
|        |                 | S1                                                                             | S2   | S3   | S4   | S5   | S6   | S7   | S8   | S9   | S10 |
| 7      | 6-7             | 0.57                                                                           | 1.30 | 1.50 | 1.20 | 1.03 | 0.80 | 0.57 | 0.87 | 1.45 |     |
| 8      | 7-8             | 0.63                                                                           | 1.50 | 1.30 | 0.90 | 1.20 | 1.00 | 0.63 | 0.92 | 1.63 |     |
| 9      | 8-9             | 0.70                                                                           | 1.50 | 1.20 | 1.00 | 1.34 | 1.10 | 0.70 | 0.93 | 1.70 |     |
| 10     | 9-10            | 0.77                                                                           | 1.30 | 1.10 | 1.10 | 1.40 | 1.20 | 0.75 | 1.03 |      |     |
| 11     | 10-11           | 0.83                                                                           | 1.30 | 1.10 | 1.10 | 1.40 | 1.25 | 0.90 | 1.05 |      |     |
| 12     | 11-12           | 0.98                                                                           | 1.30 | 1.10 | 1.10 | 1.33 | 1.40 | 1.00 | 1.03 |      |     |
| 13     | 12-13           | 1.07                                                                           | 1.20 | 1.00 | 0.90 | 1.40 | 1.40 | 1.02 | 1.07 |      |     |
| 14     | 13-14           | 1.20                                                                           | 1.20 | 1.15 | 1.00 | 1.55 | 1.40 | 1.13 | 1.03 |      |     |
| 15     | 14-15           | 1.23                                                                           | 1.35 | 1.10 | 1.50 | 1.45 | 1.40 | 1.13 | 1.03 |      |     |
| 16     | 15-16           | 1.34                                                                           | 1.30 | 1.30 | 2.60 | 1.45 | 1.40 | 1.10 | 1.12 |      |     |
| 17     | 16-17           | 1.30                                                                           | 1.30 | 1.30 | 2.90 | 1.55 | 1.40 | 1.12 | 1.10 |      |     |
| 18     | 17-18           | 1.27                                                                           | 1.20 | 1.70 | 3.35 | 1.50 | 1.40 | 1.07 | 1.10 |      |     |
| 19     | 18-19           | 1.30                                                                           | 1.20 | 1.60 |      | 1.55 | 1.40 | 1.17 | 1.03 |      |     |
| 20     | 19-20           | 1.45                                                                           | 0.80 | 1.30 |      | 0.90 | 1.40 | 1.10 | 1.03 |      |     |
| 21     | 20-21           | 1.70                                                                           | 0.90 | 1.15 |      | 1.00 | 1.40 | 1.15 | 0.90 |      |     |
| 22     | 21-22           | 1.80                                                                           | 0.70 | 1.00 |      | 1.00 | 1.40 | 0.90 | 0.90 |      |     |
| 23     | 22-23           | 1.68                                                                           | 0.50 | 1.20 |      | 0.90 | 1.40 | 0.85 | 0.90 |      |     |
| 24     | 23-24           | 1.60                                                                           | 0.50 | 1.30 |      | 0.78 | 1.65 | 0.75 | 0.85 |      |     |
| 25     | 24-25           | 1.47                                                                           | 0.50 | 1.10 |      | 0.60 | 1.60 | 0.75 | 0.83 |      |     |
| 26     | 25-26           | 1.23                                                                           | 0.40 | 1.00 |      | 0.50 | 1.10 | 0.95 | 0.80 |      |     |
| 27     | 26-27           | 1.20                                                                           | 0.40 | 0.90 |      | 0.40 | 1.00 | 1.15 | 0.83 |      |     |
| 28     | 27-28           | 1.20                                                                           | 0.30 | 0.90 |      | 0.35 | 1.00 | 1.45 | 0.78 |      |     |
| 29     | 28-29           | 1.13                                                                           | 0.30 | 1.10 |      | 0.30 | 1.20 | 1.20 | 0.60 |      |     |
| 30     | 29-30           | 1.00                                                                           | 0.30 |      |      | 0.40 | 1.20 | 1.00 | 0.50 |      |     |
| 31     | 30-31           | 0.90                                                                           | 0.30 |      |      | 0.30 | 1.35 | 1.00 | 0.50 |      |     |
| 32     | 31-32           | 0.80                                                                           | 0.30 |      |      | 0.30 |      | 0.80 | 0.35 |      |     |
| 33     | 32-33           | 0.80                                                                           | 0.30 |      |      | 0.37 |      | 0.80 | 0.30 |      |     |
| 34     | 33-34           | 0.70                                                                           | 0.30 |      |      | 0.45 |      | 0.70 | 0.20 |      |     |

**Table S2.** Depth profiles of Chl-*a* data (up to 50 m) measured at the sampling zones during 2018 and 2019 in the south Caspian Sea. Geographical location of the sampling zones is shown in the panel (b) of Fig. 1.

| <b>WINTER</b> |                 |                                                                                |      |      |      |      |      |      |      |      |     |
|---------------|-----------------|--------------------------------------------------------------------------------|------|------|------|------|------|------|------|------|-----|
| No.           | Water depth (m) | Depth profile of Chl- <i>a</i> ( $\mu\text{g/L}$ ) in different sampling zones |      |      |      |      |      |      |      |      |     |
|               |                 | S1                                                                             | S2   | S3   | S4   | S5   | S6   | S7   | S8   | S9   | S10 |
| 35            | 34-35           | 0.60                                                                           | 0.30 |      |      | 0.40 |      | 0.70 | 0.20 |      |     |
| 36            | 35-36           | 0.65                                                                           | 0.30 |      |      | 0.40 |      | 0.70 | 0.30 |      |     |
| 37            | 36-37           | 0.75                                                                           | 0.30 |      |      | 0.47 |      | 0.60 | 0.20 |      |     |
| 38            | 37-38           | 0.70                                                                           | 0.35 |      |      | 0.40 |      | 0.60 | 0.20 |      |     |
| 39            | 38-39           | 0.90                                                                           | 0.30 |      |      | 0.50 |      | 0.64 | 0.20 |      |     |
| 40            | 39-40           | 1.70                                                                           | 0.30 |      |      | 0.40 |      | 0.65 | 0.30 |      |     |
| 41            | 40-41           | 1.40                                                                           | 0.30 |      |      | 0.40 |      | 0.50 | 0.30 |      |     |
| 42            | 41-42           |                                                                                | 0.40 |      |      | 0.30 |      | 0.40 | 0.30 |      |     |
| 43            | 42-43           |                                                                                | 0.35 |      |      | 0.40 |      | 0.40 | 0.30 |      |     |
| 44            | 43-44           |                                                                                | 0.40 |      |      | 0.40 |      | 0.37 | 0.30 |      |     |
| 45            | 44-45           |                                                                                | 0.40 |      |      | 0.30 |      | 0.42 | 0.40 |      |     |
| 46            | 45-46           |                                                                                |      |      |      | 0.40 |      | 0.42 | 0.40 |      |     |
| 47            | 46-47           |                                                                                |      |      |      |      |      | 0.50 | 0.40 |      |     |
| 48            | 47-48           |                                                                                |      |      |      |      |      | 0.45 | 0.40 |      |     |
| 49            | 48-49           |                                                                                |      |      |      |      |      | 0.40 |      |      |     |
| 50            | 49-50           |                                                                                |      |      |      |      |      | 0.50 |      |      |     |
| 51            | 50-51           |                                                                                |      |      |      |      |      | 0.50 |      |      |     |
| <b>SUMMER</b> |                 |                                                                                |      |      |      |      |      |      |      |      |     |
| No.           | Water depth (m) | Depth profile of Chl- <i>a</i> ( $\mu\text{g/L}$ ) in different sampling zones |      |      |      |      |      |      |      |      |     |
|               |                 | S1                                                                             | S2   | S3   | S4   | S5   | S6   | S7   | S8   | S9   | S10 |
| 1             | 0-1             | 0.63                                                                           | 1.90 | 0.80 | 0.80 | 0.53 | 0.50 | 0.33 | 0.82 | 0.77 | 1   |
| 2             | 1-2             | 0.63                                                                           | 1.60 | 1.60 | 1.70 | 0.58 | 0.60 | 0.40 | 0.87 | 1.48 | 2   |
| 3             | 2-3             | 0.67                                                                           | 1.50 | 1.70 | 2.10 | 0.65 | 0.70 | 0.53 | 0.88 | 1.45 | 3   |
| 4             | 3-4             | 0.70                                                                           | 1.25 | 1.65 | 1.90 | 0.70 | 0.75 | 0.67 | 0.83 | 1.43 | 4   |
| 5             | 4-5             | 0.70                                                                           | 1.10 | 1.40 | 1.50 | 0.80 | 0.90 | 0.70 | 0.83 | 1.00 | 5   |
| 6             | 5-6             | 0.73                                                                           | 1.05 | 1.20 | 1.10 | 0.85 | 0.90 | 0.73 | 0.80 | 0.88 | 6   |
| 7             | 6-7             | 0.73                                                                           | 1.25 | 1.05 | 0.90 | 0.85 | 1.00 | 0.77 | 0.77 | 0.95 | 7   |
| 8             | 7-8             | 0.73                                                                           | 0.95 | 1.00 | 0.80 | 0.75 | 1.00 | 0.72 | 0.80 | 0.85 | 8   |

**Table S2.** Depth profiles of Chl-*a* data (up to 50 m) measured at the sampling zones during 2018 and 2019 in the south Caspian Sea. Geographical location of the sampling zones is shown in the panel (b) of Fig. 1.

| WINTER |                 |                                                                                |      |      |      |      |      |      |      |      |     |
|--------|-----------------|--------------------------------------------------------------------------------|------|------|------|------|------|------|------|------|-----|
| No.    | Water depth (m) | Depth profile of Chl- <i>a</i> ( $\mu\text{g/L}$ ) in different sampling zones |      |      |      |      |      |      |      |      |     |
|        |                 | S1                                                                             | S2   | S3   | S4   | S5   | S6   | S7   | S8   | S9   | S10 |
| 9      | 8-9             | 0.75                                                                           | 1.10 | 0.90 | 0.75 | 0.75 | 1.00 | 0.70 | 0.83 | 0.85 | 9   |
| 10     | 9-10            | 0.73                                                                           | 0.90 | 0.90 | 0.70 | 0.80 | 0.95 | 0.73 | 0.77 |      | 10  |
| 11     | 10-11           | 0.70                                                                           | 0.90 | 0.90 | 0.70 | 0.80 | 0.90 | 0.67 | 0.77 |      | 11  |
| 12     | 11-12           | 0.70                                                                           | 0.90 | 0.80 | 0.70 | 0.78 | 0.90 | 0.63 | 0.77 |      | 12  |
| 13     | 12-13           | 0.67                                                                           | 0.90 | 0.80 | 0.70 | 0.75 | 0.90 | 0.65 | 0.80 |      | 13  |
| 14     | 13-14           | 0.67                                                                           | 0.90 | 0.80 | 0.75 | 0.70 | 0.90 | 0.63 | 0.73 |      | 14  |
| 15     | 14-15           | 0.60                                                                           | 0.80 | 0.70 | 0.70 | 0.75 | 0.80 | 0.63 | 0.73 |      | 15  |
| 16     | 15-16           | 0.63                                                                           | 0.80 | 0.60 | 0.60 | 0.75 | 0.80 | 0.70 | 0.67 |      | 16  |
| 17     | 16-17           | 0.57                                                                           | 0.70 | 0.60 | 0.50 | 0.80 | 0.85 | 0.67 | 0.67 |      | 17  |
| 18     | 17-18           | 0.53                                                                           | 0.60 | 0.60 | 0.50 | 0.85 | 0.80 | 0.67 | 0.71 |      | 18  |
| 19     | 18-19           | 0.53                                                                           | 0.50 | 0.60 | 0.55 | 0.85 | 0.75 | 0.67 | 0.70 |      | 19  |
| 20     | 19-20           | 0.47                                                                           | 0.50 | 0.60 |      | 0.80 | 0.70 | 0.63 | 0.60 |      | 20  |
| 21     | 20-21           | 0.50                                                                           | 0.45 | 0.60 |      | 0.80 | 0.70 | 0.67 | 0.65 |      | 21  |
| 22     | 21-22           | 0.48                                                                           | 0.50 | 0.60 |      | 0.83 | 0.70 | 0.72 | 0.63 |      | 22  |
| 23     | 22-23           | 0.45                                                                           | 0.50 | 0.60 |      | 0.75 | 0.65 | 0.70 | 0.63 |      | 23  |
| 24     | 23-24           | 0.40                                                                           | 0.50 | 0.60 |      | 0.70 | 0.60 | 0.75 | 0.63 |      | 24  |
| 25     | 24-25           | 0.40                                                                           | 0.50 | 0.60 |      | 0.68 | 0.60 | 0.75 | 0.60 |      | 25  |
| 26     | 25-26           | 0.40                                                                           | 0.50 | 0.60 |      | 0.65 | 0.60 | 0.75 | 0.60 |      | 26  |
| 27     | 26-27           | 0.40                                                                           | 0.40 | 0.55 |      | 0.63 | 0.50 | 0.70 | 0.68 |      | 27  |
| 28     | 27-28           | 0.35                                                                           | 0.40 | 0.50 |      | 0.60 | 0.50 | 0.70 | 0.70 |      | 28  |
| 29     | 28-29           | 0.35                                                                           | 0.40 | 0.50 |      | 0.60 | 0.50 | 0.60 | 0.65 |      | 29  |
| 30     | 29-30           | 0.35                                                                           | 0.40 |      |      | 0.70 | 0.50 | 0.60 | 0.65 |      | 30  |
| 31     | 30-31           | 0.30                                                                           | 0.35 |      |      | 0.50 | 0.40 | 0.45 | 0.65 |      | 31  |
| 32     | 31-32           | 0.30                                                                           | 0.30 |      |      | 0.40 | 0.40 | 0.43 | 0.83 |      | 32  |
| 33     | 32-33           | 0.30                                                                           | 0.30 |      |      | 0.40 | 0.50 | 0.40 | 0.90 |      | 33  |
| 34     | 33-34           | 0.30                                                                           | 0.30 |      |      | 0.40 | 0.40 | 0.40 | 0.80 |      | 34  |
| 35     | 34-35           | 0.30                                                                           | 0.30 |      |      | 0.40 | 0.40 | 0.40 | 0.80 |      | 35  |
| 36     | 35-36           | 0.45                                                                           | 0.30 |      |      | 0.30 | 0.30 | 0.30 | 0.80 |      | 36  |

**Table S2.** Depth profiles of Chl-*a* data (up to 50 m) measured at the sampling zones during 2018 and 2019 in the south Caspian Sea. Geographical location of the sampling zones is shown in the panel (b) of Fig. 1.

| <b>WINTER</b> |                 |                                                                   |      |      |      |      |      |      |      |      |     |
|---------------|-----------------|-------------------------------------------------------------------|------|------|------|------|------|------|------|------|-----|
| No.           | Water depth (m) | Depth profile of Chl- <i>a</i> (µg/L) in different sampling zones |      |      |      |      |      |      |      |      |     |
|               |                 | S1                                                                | S2   | S3   | S4   | S5   | S6   | S7   | S8   | S9   | S10 |
| 37            | 36-37           | 0.40                                                              | 0.30 |      |      | 0.30 | 0.30 | 0.30 | 0.70 |      | 37  |
| 38            | 37-38           | 0.35                                                              | 0.30 |      |      | 0.30 | 0.25 | 0.30 | 0.70 |      | 38  |
| 39            | 38-39           | 0.50                                                              | 0.30 |      |      | 0.30 | 0.30 | 0.30 | 0.70 |      | 39  |
| 40            | 39-40           | 0.30                                                              | 0.30 |      |      | 0.30 | 0.30 | 0.30 | 0.70 |      | 40  |
| 41            | 40-41           | 0.40                                                              | 0.30 |      |      | 0.30 | 0.20 | 0.30 | 0.70 |      | 41  |
| 42            | 41-42           |                                                                   | 0.30 |      |      | 0.30 | 0.20 | 0.30 | 0.70 |      | 42  |
| 43            | 42-43           |                                                                   | 0.30 |      |      | 0.30 | 0.20 | 0.30 | 0.70 |      | 43  |
| 44            | 43-44           |                                                                   | 0.30 |      |      | 0.30 | 0.20 | 0.30 | 0.80 |      | 44  |
| 45            | 44-45           |                                                                   | 0.35 |      |      | 0.30 |      | 0.30 | 0.90 |      | 45  |
| 46            | 45-46           |                                                                   |      |      |      | 0.30 |      | 0.30 |      |      | 46  |
| 47            | 46-47           |                                                                   |      |      |      | 0.30 |      | 0.30 |      |      | 47  |
| 48            | 47-48           |                                                                   |      |      |      | 0.30 |      | 0.30 |      |      | 48  |
| 49            | 48-49           |                                                                   |      |      |      | 0.30 |      | 0.30 |      |      | 49  |
| 50            | 49-50           |                                                                   |      |      |      | 0.25 |      | 0.25 |      |      | 50  |
| <b>AUTUMN</b> |                 |                                                                   |      |      |      |      |      |      |      |      |     |
| No.           | Water depth (m) | Depth profile of Chl- <i>a</i> (µg/L) in different sampling zones |      |      |      |      |      |      |      |      |     |
|               |                 | S1                                                                | S2   | S3   | S4   | S5   | S6   | S7   | S8   | S9   | S10 |
| 1             | 0-1             | 0.64                                                              | 2.73 | 2.30 | 2.60 | 1.82 |      | 0.82 | 0.48 | 0.15 | 1   |
| 2             | 1-2             | 0.65                                                              | 2.90 | 2.40 | 2.40 | 1.36 |      | 1.01 | 0.81 | 0.23 | 2   |
| 3             | 2-3             | 1.52                                                              | 2.65 | 2.30 | 2.60 | 1.76 |      | 1.21 | 1.05 | 0.28 | 3   |
|               | 3-4             | 1.92                                                              | 2.70 | 2.40 | 3.00 | 1.93 |      | 1.23 | 1.27 | 0.25 |     |
| 5             | 4-5             | 1.30                                                              | 2.90 | 2.40 | 2.90 | 1.70 |      | 1.22 | 1.48 | 0.32 | 5   |
| 6             | 5-6             | 1.48                                                              | 2.30 | 2.90 | 2.80 | 1.60 |      | 1.15 | 1.55 | 0.40 | 6   |
| 7             | 6-7             | 1.47                                                              | 2.00 | 2.30 | 2.70 | 4.32 |      | 1.09 | 1.63 | 0.40 | 7   |
| 8             | 7-8             | 1.65                                                              | 1.95 | 2.50 | 2.80 | 1.73 |      | 1.13 | 1.67 | 0.40 | 8   |
| 9             | 8-9             | 1.55                                                              | 1.80 | 2.60 | 2.40 | 1.45 |      | 1.11 | 1.60 |      | 9   |
| 10            | 9-10            | 1.67                                                              | 2.10 | 2.55 | 2.30 | 1.40 |      | 1.10 | 1.53 |      | 10  |
| 11            | 10-11           | 1.58                                                              | 1.95 | 2.20 | 2.35 | 1.50 |      | 1.05 | 1.55 |      | 11  |



**Table S2.** Depth profiles of Chl-*a* data (up to 50 m) measured at the sampling zones during 2018 and 2019 in the south Caspian Sea. Geographical location of the sampling zones is shown in the panel (b) of Fig. 1.

| <b>WINTER</b> |                 |                                                                                |      |      |      |      |      |      |      |    |     |
|---------------|-----------------|--------------------------------------------------------------------------------|------|------|------|------|------|------|------|----|-----|
| No.           | Water depth (m) | Depth profile of Chl- <i>a</i> ( $\mu\text{g/L}$ ) in different sampling zones |      |      |      |      |      |      |      |    |     |
|               |                 | S1                                                                             | S2   | S3   | S4   | S5   | S6   | S7   | S8   | S9 | S10 |
| 12            | 11-12           | 1.58                                                                           | 2.14 | 2.10 | 2.60 | 1.33 |      | 1.03 | 1.58 |    | 12  |
| 13            | 12-13           | 1.63                                                                           | 1.75 | 2.00 | 2.70 | 1.15 |      | 1.07 | 1.52 |    | 13  |
| 14            | 13-14           | 1.67                                                                           | 1.60 | 2.00 | 2.80 | 1.10 |      | 1.03 | 1.48 |    | 14  |
| 15            | 14-15           | 1.63                                                                           | 1.55 | 1.90 | 2.40 | 1.23 |      | 1.12 | 1.52 |    | 15  |
| 16            | 15-16           | 1.60                                                                           | 1.65 | 1.70 | 2.00 | 1.20 |      | 1.00 | 1.43 |    | 16  |
| 17            | 16-17           | 1.50                                                                           | 1.40 | 1.85 | 1.95 | 1.38 | 1.20 | 1.10 | 1.38 |    | 17  |
| 18            | 17-18           | 1.63                                                                           | 1.45 | 1.80 | 2.10 | 1.25 | 1.20 | 1.00 | 1.40 |    | 18  |
| 19            | 18-19           | 1.75                                                                           | 1.35 | 1.70 |      | 1.00 | 1.15 | 1.04 | 1.37 |    | 19  |
| 20            | 19-20           | 1.84                                                                           | 1.30 | 1.40 |      | 1.10 | 1.10 | 0.98 | 1.50 |    | 20  |
| 21            | 20-21           | 1.48                                                                           | 1.55 | 1.40 |      | 1.10 | 1.10 | 0.98 | 1.25 |    | 21  |
| 22            | 21-22           | 1.55                                                                           | 1.30 | 1.35 |      | 1.00 | 1.15 | 0.87 | 1.30 |    | 22  |
| 23            | 22-23           | 1.45                                                                           | 1.30 | 1.60 |      | 1.10 | 0.90 | 0.88 | 1.40 |    | 23  |
| 24            | 23-24           | 1.43                                                                           | 1.30 | 1.20 |      | 1.10 | 0.90 | 0.88 | 1.30 |    | 24  |
| 25            | 24-25           | 1.38                                                                           | 1.30 | 1.20 |      | 0.90 | 0.95 | 0.70 | 1.10 |    | 25  |
| 26            | 25-26           | 1.53                                                                           | 1.30 |      |      | 1.00 | 0.80 | 0.80 | 1.15 |    | 26  |
| 27            | 26-27           | 1.35                                                                           | 1.33 |      |      | 0.90 | 0.80 | 0.75 | 0.88 |    | 27  |
| 28            | 27-28           | 1.43                                                                           | 1.40 |      |      | 0.90 | 0.80 | 0.75 | 0.85 |    | 28  |
| 29            | 28-29           | 1.48                                                                           | 1.34 |      |      | 0.90 | 0.80 | 0.83 | 0.60 |    | 29  |
| 30            | 29-30           | 1.53                                                                           | 1.20 |      |      | 0.95 | 0.85 | 0.70 | 0.45 |    | 30  |
| 31            | 30-31           | 1.30                                                                           | 1.50 |      |      | 1.00 | 0.95 | 0.83 | 0.30 |    | 31  |
| 32            | 31-32           | 1.40                                                                           | 1.20 |      |      | 0.90 | 0.80 | 0.50 | 0.35 |    | 32  |
| 33            | 32-33           | 1.40                                                                           | 1.55 |      |      | 0.85 | 0.70 | 0.50 | 0.25 |    | 33  |
| 34            | 33-34           | 1.45                                                                           | 1.30 |      |      | 0.90 | 0.70 | 0.50 | 0.28 |    | 34  |
| 35            | 34-35           | 1.20                                                                           | 1.30 |      |      | 0.80 | 0.70 | 0.50 | 0.29 |    | 35  |
| 36            | 35-36           | 1.40                                                                           | 1.20 |      |      | 0.70 | 0.70 | 0.50 | 0.20 |    | 36  |
| 37            | 36-37           | 1.63                                                                           | 1.20 |      |      | 0.70 |      | 0.40 | 0.30 |    | 37  |
| 38            | 37-38           |                                                                                | 1.30 |      |      | 0.65 |      | 0.50 |      |    | 38  |
| 39            | 38-39           |                                                                                | 1.20 |      |      | 0.50 |      | 0.50 |      |    | 39  |

**Table S2.** Depth profiles of Chl-*a* data (up to 50 m) measured at the sampling zones during 2018 and 2019 in the south Caspian Sea. Geographical location of the sampling zones is shown in the panel (b) of Fig. 1.

| <b>WINTER</b> |                 |                                                                   |      |    |    |      |    |      |    |    |     |
|---------------|-----------------|-------------------------------------------------------------------|------|----|----|------|----|------|----|----|-----|
| No.           | Water depth (m) | Depth profile of Chl- <i>a</i> (µg/L) in different sampling zones |      |    |    |      |    |      |    |    |     |
|               |                 | S1                                                                | S2   | S3 | S4 | S5   | S6 | S7   | S8 | S9 | S10 |
| 40            | 39-40           |                                                                   | 1.25 |    |    | 0.40 |    | 0.40 |    |    | 40  |
| 41            | 40-41           |                                                                   | 1.10 |    |    | 0.70 |    | 0.40 |    |    | 41  |
| 42            | 41-42           |                                                                   | 1.25 |    |    |      |    | 0.40 |    |    | 42  |
| 43            | 42-43           |                                                                   | 1.25 |    |    |      |    | 0.45 |    |    | 43  |
| 44            | 43-44           |                                                                   | 1.20 |    |    |      |    | 0.40 |    |    | 44  |
| 45            | 44-45           |                                                                   |      |    |    |      |    | 0.40 |    |    | 45  |
| 46            | 45-46           |                                                                   |      |    |    |      |    | 0.40 |    |    | 46  |
